# Supplementary material
Source: PubMed Central journal article supplement (PMC7327500)
Supplement: EMBJ-39-e103630-s001.pdf [file EMBJ-39-e103630-s001.pdf]

## **Appendix**

### **CBF1, a key cold response regulator, promotes *Arabidopsis* hypocotyl growth at ambient temperatures**

This PDF file includes:

Appendix Figures S1 to S11

Appendix Table S1

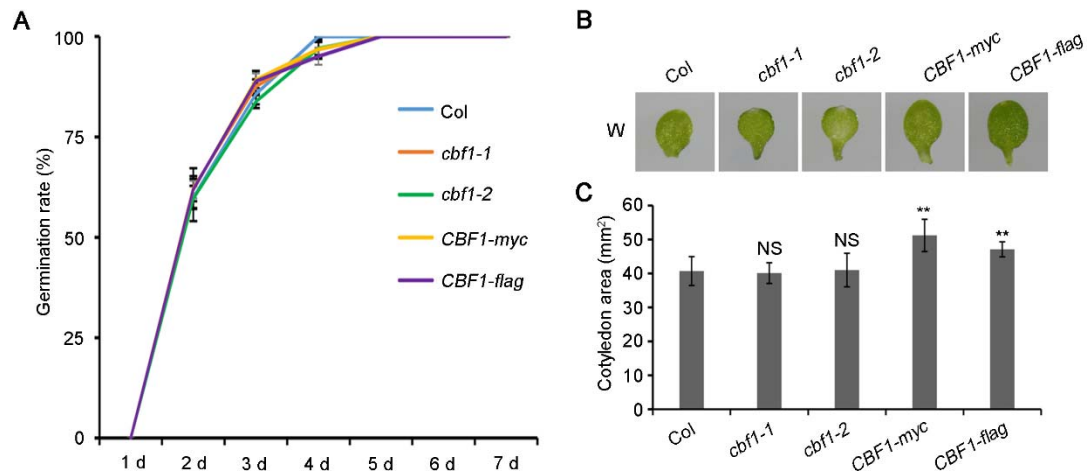

**Appendix Figure S1. Germination rates and cotyledon areas of Col, *cbf1* mutants and CBF1-OE lines grown in continuous white light.**

- A Germination rates of Col, two *cbf1* mutants (*cbf1-1* and *cbf1-2*) and two CBF1-OE lines (*CBF1-myc* and *CBF1-flag*) grown at 22°C in continuous W light for the indicated days.
- B, C Cotyledon phenotypes (B) and areas (C) of Col, two *cbf1* mutants (*cbf1-1* and *cbf1-2*) and two CBF1-OE lines (*CBF1-myc* and *CBF1-flag*) grown at 22°C in continuous W light for 5 d. Error bars represent SD from 10 seedlings. \*\* $P < 0.01$  (two-tailed *t*-test) for the indicated genotype compared with Col. NS, not significant.

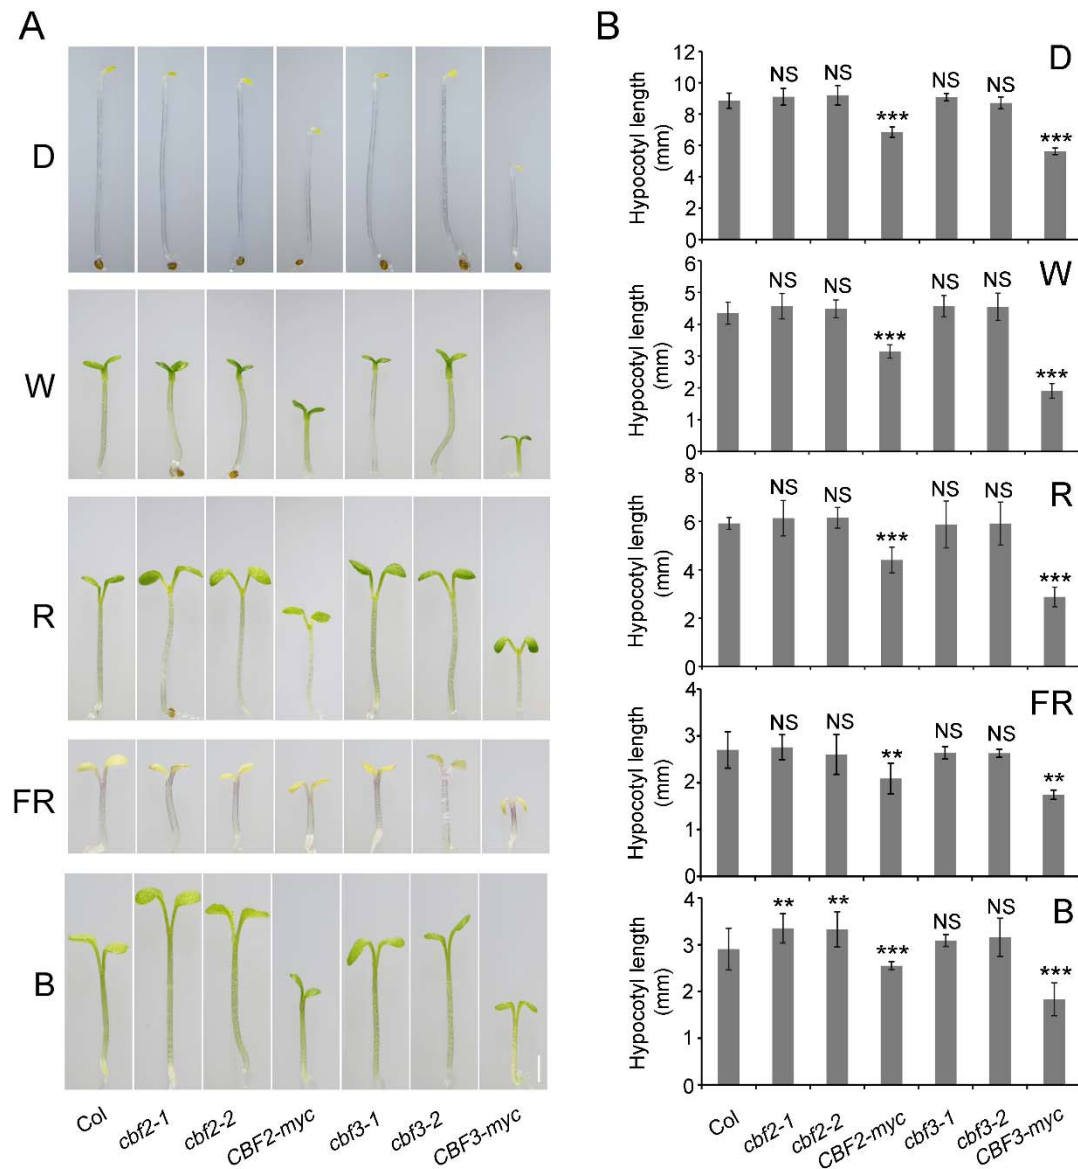

**Appendix Figure S2. Phenotypes of loss-of-function mutants and overexpression lines of *CBF2* and *CBF3* grown under different light conditions.**

A Phenotypes of 4-d-old Col, *cbf2-1*, *cbf2-2*, *CBF2-myc*, *cbf3-1*, *cbf3-2*, and *CBF3-myc* seedlings grown at 22°C in darkness (D) or continuous FR, R, B, and W light. Bar = 1 mm.

B Hypocotyl lengths of 4-d-old Col, *cbf2-1*, *cbf2-2*, *CBF2-myc*, *cbf3-1*, *cbf3-2*, and *CBF3-myc* seedlings grown at 22°C in darkness (D) or continuous FR, R, B, and W light. Error bars represent SD from 20 seedlings. \*\* $P < 0.01$  and \*\*\* $P < 0.001$  (two-tailed *t*-test) for the indicated genotype compared with Col.

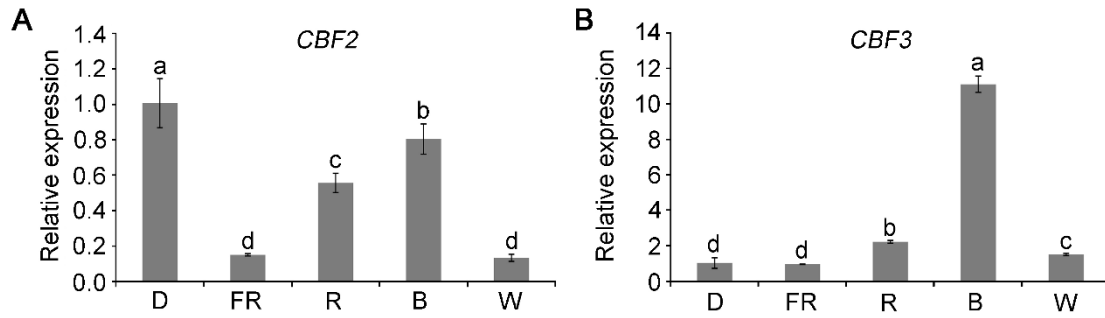

**Appendix Figure S3. The expression levels of *CBF2* and *CBF3* in different light conditions.**

qRT-PCR data showing the relative expression of *CBF2* (A) and *CBF3* (B) in 4-d-old Col grown at 22°C in darkness (D) or continuous FR, R, B, and W light. Error bars represent SD of three technical replicates. Different letters represent significant differences by one-way ANOVA with Duncan's post hoc test ( $P < 0.05$ ).

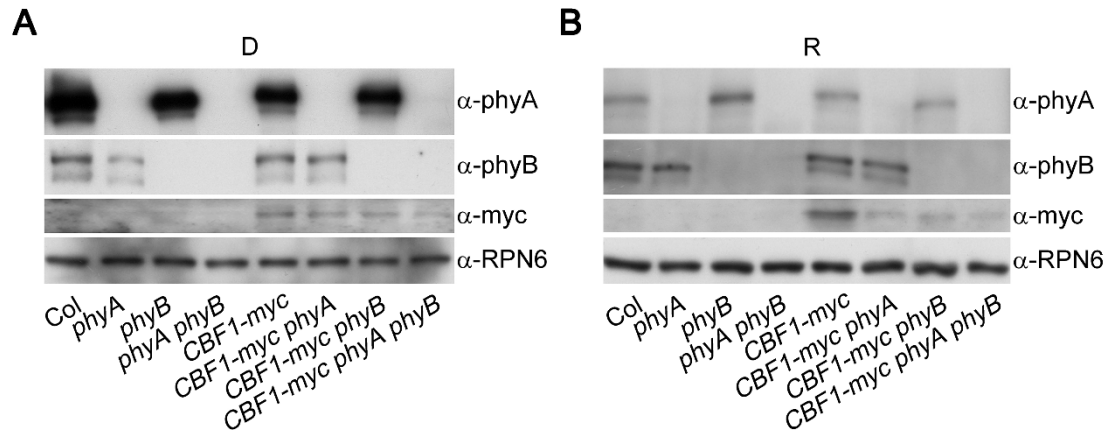

**Appendix Figure S4. Genotyping of *CBF1-myc phyA*, *CBF1-myc phyB* and *CBF1-myc phyA phyB* seedlings by immunoblotting.**

Immunoblots showing the levels of phyA, phyB, and CBF1-myc proteins in 4-d-old Col, *phyA*, *phyB*, *phyA phyB*, *CBF1-myc*, *CBF1-myc phyA*, *CBF1-myc phyB*, and *CBF1-myc phyA phyB* seedlings grown at 22°C in darkness (A) or continuous R light (B). Anti-RPN6 was used as a sample loading control.

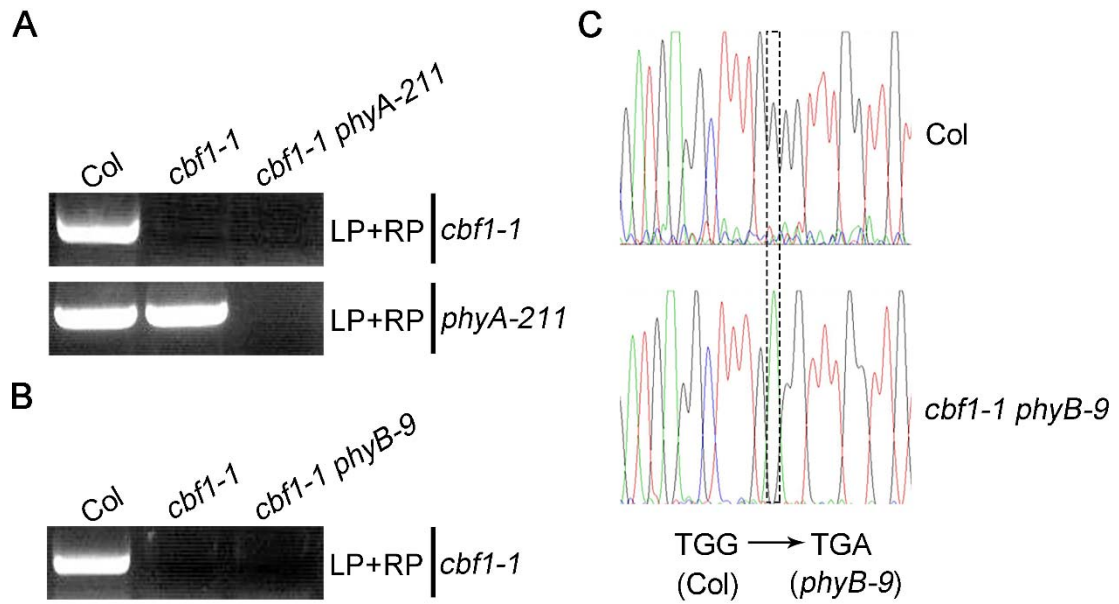

**Appendix Figure S5. Genotyping of *cbf1-1 phyA-211* and *cbf1-1 phyB-9* mutants.**

- A** Genotyping of the *cbf1-1* and *phyA-211* loci in *cbf1-1 phyA-211* mutants by PCR using the LP and RP primers shown in Appendix Table S1.
- B** Genotyping of the *cbf1-1* locus in *cbf1-1 phyB-9* mutants by PCR.
- C** Genotyping of the *phyB-9* locus in *cbf1-1 phyB-9* mutants by sequencing the PCR products containing the Trp397 (TGG) to TGA mutation.

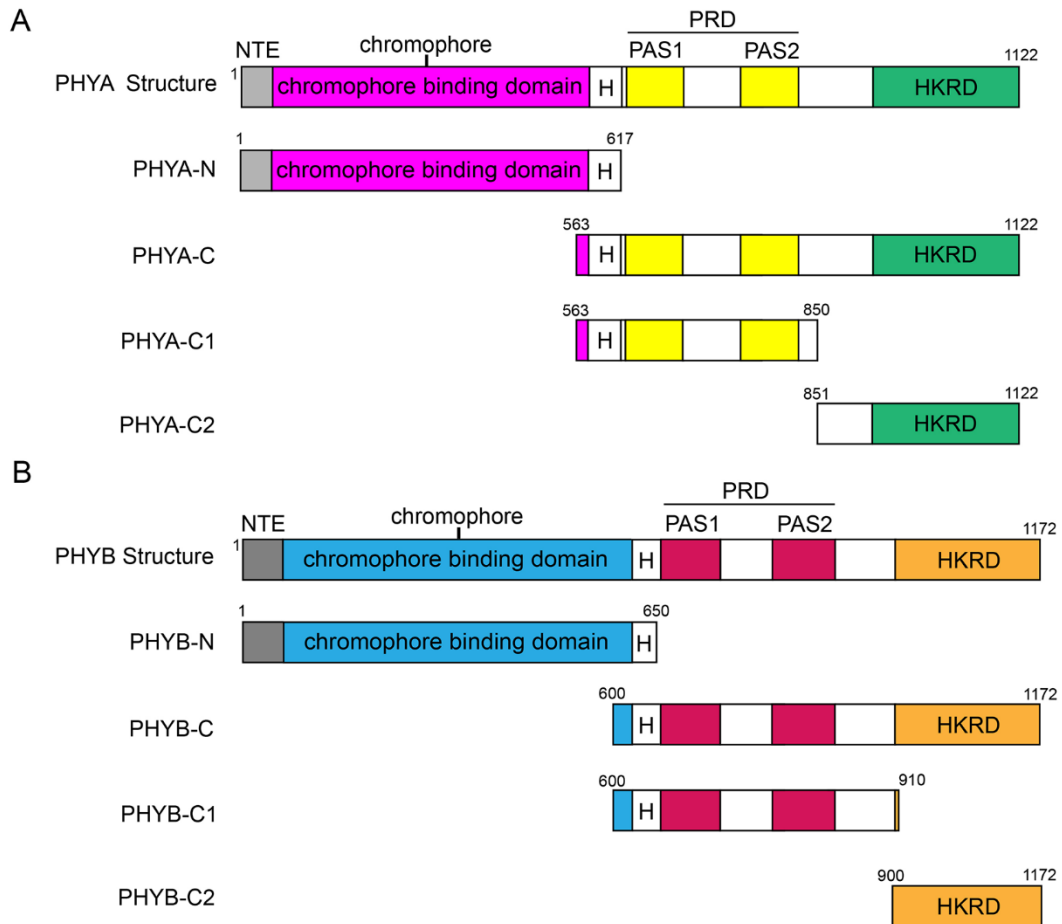

**Appendix Figure S6. Different domains of PHYA and PHYB used for *in vitro* pull-down assays.**

Domain structures of PHYA (A) and PHYB (B), and different domains of PHYA and PHYB fused with GST or His for *in vitro* pull-down assays. The domain structures were based on previous studies (Mathews *et al*, 1995; Quail *et al*, 1997; Seo *et al*, 2004). NTE, N-terminal extension; PRD, PAS-related domain; HKRD, histidine kinase-related domain; H, hinge.

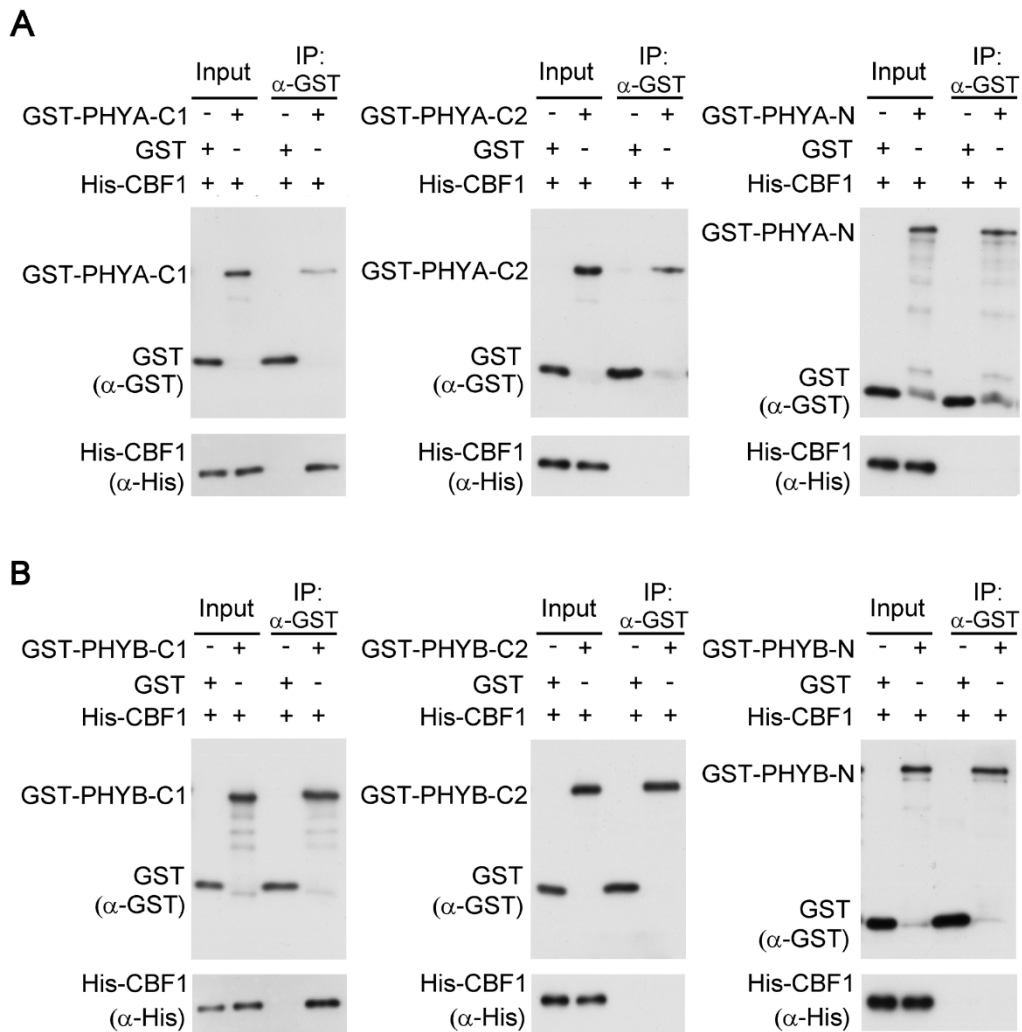

**Appendix Figure S7. Pull-down of CBF1 with the PRD domains of PHYA and PHYB *in vitro*.**

The His-tagged CBF1 proteins pulled down with GST-tagged PHYA/B-N, PHYA/B-C1 (PAS-related domain), PHYA/B-C2 (histidine kinase-related domain), or GST were detected by anti-His antibody. Input, 6% of the His-tagged purified target proteins used in pull-down assays.



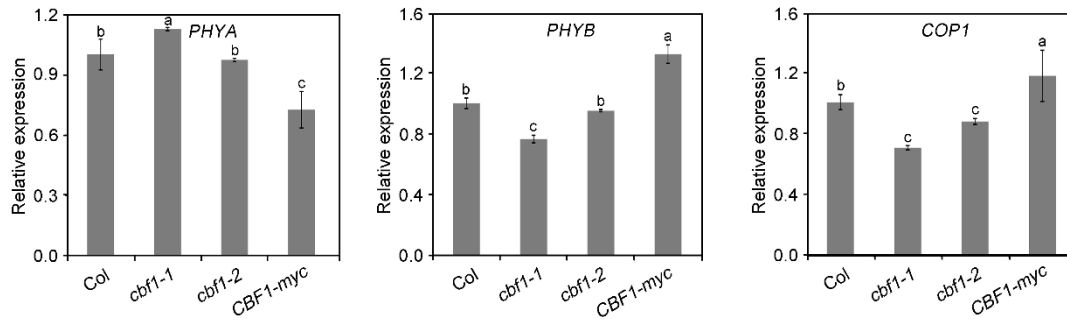

**Appendix Figure S8. Expression of *PHYA*, *PHYB*, and *COP1* in *cbf1* mutants and CBF1-OE seedlings grown in the light.**

qRT-PCR assays showing the relative expression of *PHYA*, *PHYB*, and *COP1* in 4-d-old Col, *cbf1-1*, *cbf1-2* and *CBF1-myc* seedlings grown at 22°C in continuous W light for 4 d. Error bars represent SD of three technical replicates. Different letters represent significant differences by one-way ANOVA with Duncan's post hoc test ( $P < 0.05$ ).

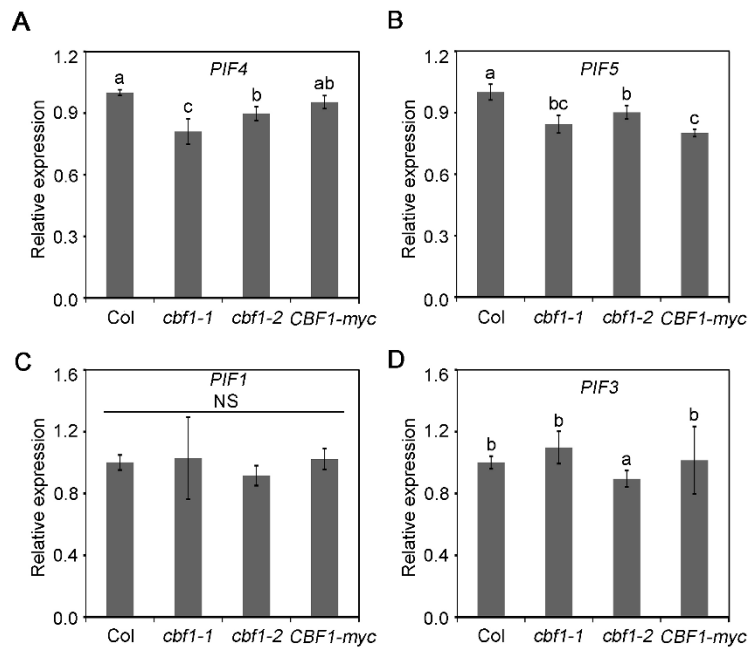

**Appendix Figure S9. Expression of *PIF4*, *PIF5*, *PIF1* and *PIF3* in *cbf1* mutants and *CBF1*-OE seedlings grown in darkness.**

qRT-PCR assays showing the expression levels of *PIF4*, *PIF5*, *PIF1* and *PIF3* in 4-d-old Col, *cbf1-1*, *cbf1-2* and *CBF1-myc* seedlings grown at 22°C in darkness. Error bars represent SD of three technical replicates. Different letters represent significant differences by one-way ANOVA with Duncan's post hoc test ( $P < 0.05$ ). NS, not significant.

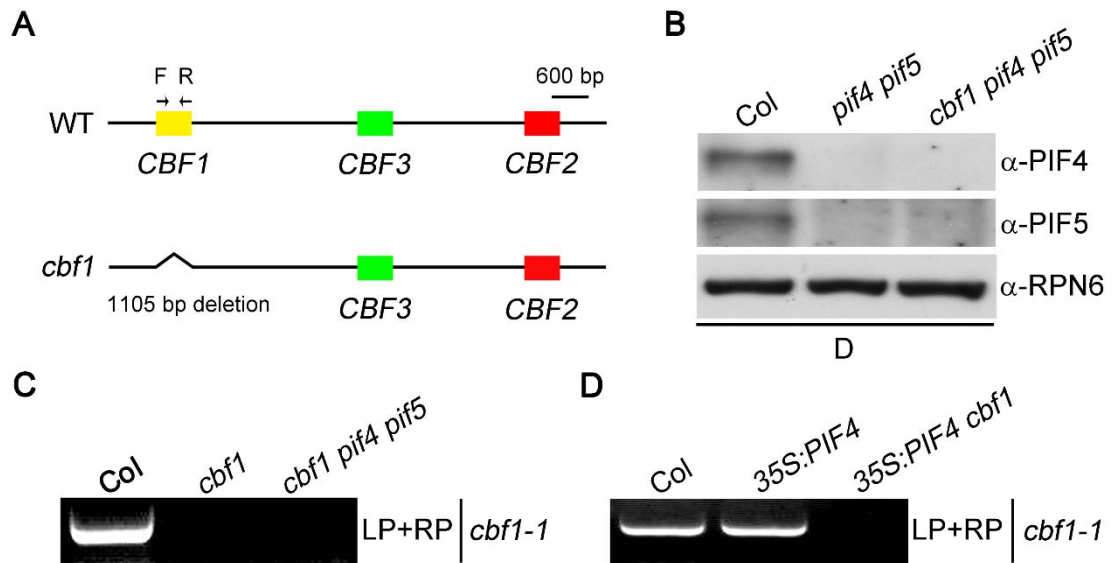

**Appendix Figure S10. Genotyping of *cbf1 pif4 pif5* and *35S:PIF4 cbf1* seedlings.**

- A Schematic representation of the CBF1-CBF3 cluster, and of the mutation in the *cbf1-1* mutant (Zhao *et al.*, 2016).
- B Immunoblots showing the levels of PIF4 and PIF5 proteins in 4-d-old Col, *pif4 pif5* and *cbf1 pif4 pif5* seedlings grown at 22°C in darkness. Anti-RPN6 was used as a sample loading control.
- C Genotyping of the *cbf1-1* locus in *cbf1 pif4 pif5* mutants by PCR.
- D Genotyping of the *cbf1-1* locus in *35S:PIF4 cbf1* seedlings by PCR.

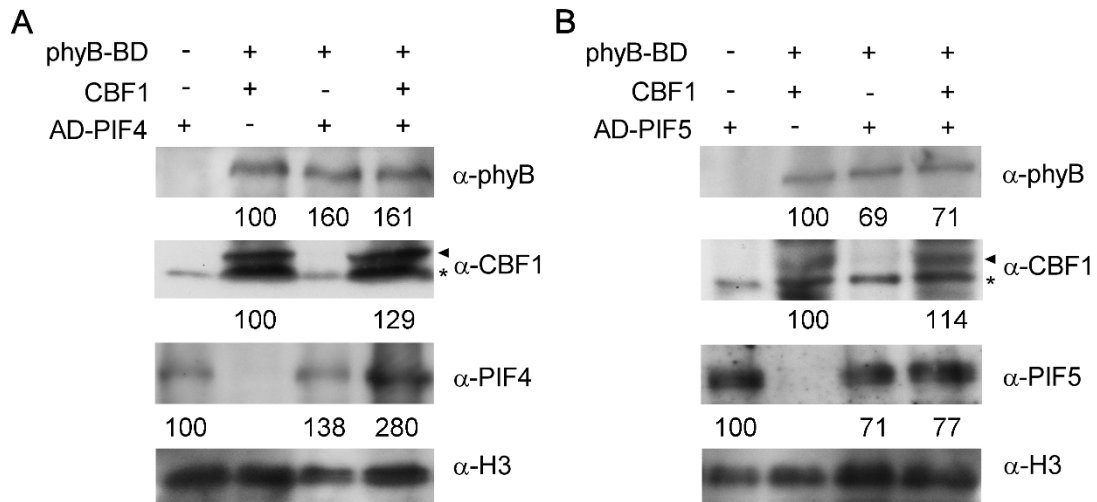

**Appendix Figure S11. The levels of phyB-BD, CBF1, AD-PIF4/PIF5 proteins in yeast cells used for yeast three-hybrid assays.**

Immunoblots showing the levels of phyB-BD, CBF1, and AD-PIF4 (A) or AD-PIF5 (B) proteins in yeast cultures co-expressing the indicated combinations of proteins. Anti-H3 was used as a sample loading control. The asterisk indicates a cross-reacting band recognized by our anti-CBF1 antibodies. Numbers below the immunoblots indicate the relative band intensities of phyB-BD, CBF1, and AD-PIF4/PIF5 normalized to those of loading control, respectively. The ratio of the first band was set to 100 for each blot.

## Appendix References

Mathews S, Lavin M, Sharrock RA (1995) Evolution of phytochrome gene family and its utility for phylogenetic analyses of angiosperms. *Anal Missouri Bot Garden* 82: 296–321

Quail PH (1997) The phytochromes: a biochemical mechanism of signaling in sight? *Bioessays* 19: 571–579

Seo HS, Watanabe E, Tokutomi S, Nagatani A, Chua NH (2004) Photoreceptor ubiquitination by COP1 E3 ligase desensitizes phytochrome A signaling. *Genes Dev* 18: 617–622

Zhao C, Zhang Z, Xie S, Si T, Li Y, Zhu JK (2016) Mutational evidence for the critical role of CBF transcription factors in cold acclimation in *Arabidopsis*. *Plant Physiol* 171: 2744–2759

| Appendix Table S1. Summary of primers used in this study.                                         |                                              |                                                                          |
|---------------------------------------------------------------------------------------------------|----------------------------------------------|--------------------------------------------------------------------------|
| Purpose                                                                                           | Primer Sequence (5'-3')                      |                                                                          |
| Plasmid Constructs (Note: The underlined nucleotides indicate the restriction sites for cloning.) |                                              |                                                                          |
| AD fusions<br>(pGADT7 vector,<br>used in GAL4 Y3H<br>system)                                      | PIF4                                         | TGGATCGAATTCATGGAACACCAAGGTTGG                                           |
|                                                                                                   |                                              | TGGATCCTCGAGCTAGTGGTCCAAACGAGA                                           |
|                                                                                                   | PIF5                                         | TGGATCGAATTCATGGAACAAGTGTTTGCT                                           |
|                                                                                                   |                                              | TGGATCCTCGAGTCAGCCTATTTTACCCAT                                           |
| BD fusions (D153<br>vector, used in<br>GAL4 Y3H system)                                           | phyB                                         | TGGATCGCGGCCGCATGGTTTCCGGAGTCGGGGGT                                      |
|                                                                                                   |                                              | TGGATCGCGGCCGCATATGGCATCATCAGCAT                                         |
| pRS423-JL vector                                                                                  | Modification of<br>Multiple Cloning<br>Sites | ACCGACGAGCTCGCACTAGTCGCTGCAGTGCCGCGGAACCCGGG<br>TTGAATTTTCAAAAATTCTTAC   |
|                                                                                                   |                                              | CGATTGCTCGAGTGGCGGCCGCTCGTCGACCCATCGATCGGGAT<br>CCGTTTTTCTCCTTGACGTTAAAG |
|                                                                                                   | CBF1                                         | TGGATCGGATCCATGAACTCATTTTCAGCT                                           |
|                                                                                                   |                                              | TGGATCCTCGAGTTAGTAACTCCAAAGCGA                                           |
| cLUC fusions<br>(35S:cLuc vector)                                                                 | CBF1                                         | TGGATCGGTACCATGAACTCATTTTCAGCT                                           |
|                                                                                                   |                                              | TGGATCGGATCCTTAGTAACTCCAAAGCGA                                           |
|                                                                                                   | phyB                                         | TGGATCGGTACCATGTCAGGCTCTAGGCCGAC                                         |
|                                                                                                   |                                              | TGGATCGGTACCCTAATATGGCATCATCAGCAT                                        |
| nLUC fusions<br>(35S:nLuc vector)                                                                 | phyA                                         | GGAAGGATCCAATGTCAGGCTCTAGGCCGAC                                          |
|                                                                                                   |                                              | GGAAGTCGACCTTGTTTGCTGCAGCGAGTTC                                          |
|                                                                                                   | PIF4                                         | TGGATCGGTACCATGGAACACCAAGGTTGG                                           |
|                                                                                                   |                                              | TGGATCGTTCGACGTGGTCCAAACGAGAACC                                          |
|                                                                                                   | PIF5                                         | TGGATCGGTACCATGGAACAAGTGTTTGCT                                           |
|                                                                                                   |                                              | TGGATCGTTCGACGCCTATTTTACCCATATG                                          |
| pSuper1300-GFP<br>vector                                                                          | CBF1                                         | TGGATCAAGCTTATGAACTCATTTTCAGCT                                           |
|                                                                                                   |                                              | TGGATCGTTCGACGGTAACTCCAAAGCGACAC                                         |

|                                                             |           |                                       |
|-------------------------------------------------------------|-----------|---------------------------------------|
| pCAMBIA1381<br>vector                                       | CBF1p:GUS | GCGAATTCGTTTTCTCTTCATTGGATTG          |
|                                                             |           | GCGGATCCTGATCAGAGTACTCTGTTTC          |
| pK7WFWG2 vector                                             | CBF1-FLAG | TGGATCCTCTAGAATGAACTCATTTTCAGCT       |
|                                                             |           | TGGATCGGTACCGGTA ACTCCAAAGCGACAC      |
| GST fusions (pGEX-4T-1 vector) / His fusion (pET28a vector) | phyA-C1   | GAATTCGGATCCACAAGGAGTTTACCTTGGAAAGG   |
|                                                             |           | CTCGAGGTCGACCTACTCCACATACTTGCCACCTC   |
|                                                             | phyA-C2   | GAATTCGGATCCTGTCTGTTGTGTGTGAGTAAG     |
|                                                             |           | CTCGAGGTCGACCTACTTGTGGCTGCAGCGAGTTC   |
|                                                             | phyA-N    | GAATTCGGATCCATGTCAGGCTCTAGGCCGACT     |
|                                                             |           | CTCGAGGTCGACCTAAGCTTCTAGTTCTTGTATAACC |
|                                                             | phyB-C1   | TTGATCGGATCCGAAACTGCGGAAATGGATG       |
|                                                             |           | TTGATCGCGGCCGCCTACTCAGGGCTCGGGATTG    |
|                                                             | phyB-C2   | TGGATCGGATCCGCTTTCTGTTTCTTGCAAATC     |
|                                                             |           | TGCAGCCTCGAGCTAATATGGCATCATCAGCAT     |
|                                                             | phyB-N    | TTGATCGAATTCATGGTTTCCGGAGTCGGG        |
|                                                             |           | TTGATCGCGGCCGCCTAACCTAACTCATCAATCCC   |
| GST fusions (pGEX-4T-1 vector)                              | CBF1      | TTGATCGGATCCATGAACTCATTTTCAGCT        |
|                                                             |           | TTGATCGAATTCTTAGTAACTCCAAAGCGA        |
| 6His fusions (pET28a vector)                                | CBF1      | TGGATCGAATTCATGAACTCATTTTCAGCT        |
|                                                             |           | TGGATCCTCGAGTTAGTAACTCCAAAGCGACAC     |
| Genotyping                                                  |           |                                       |
| CBF1                                                        |           | TGGATCGGTACCATGAACTCATTTTCAGCT        |
|                                                             |           | TGGATCGTCGACGTA ACTCCAAAGCGACAC       |
| phyA                                                        |           | GACACGATGATTCCTGCATC                  |
|                                                             |           | CAGCTGTGCGGTGCTCTAA                   |
| phyB                                                        |           | CTACTCTTGAGAAACCTGAG                  |
|                                                             |           | GAGTCTCTCAGAATAAGCTG                  |

| Antibody                        |      |                                   |
|---------------------------------|------|-----------------------------------|
| 6His fusions<br>(pET28a vector) | phyB | TGGATCGGATCCGCTTTCTGTTTCTTGCAAATC |
|                                 |      | TGCAGCCTCGAGCTAATATGGCATCATCAGCAT |
| Real-time qRT-PCR               |      |                                   |
| CBF1                            |      | GCATGTCTCAACTTCGCTGA              |
|                                 |      | ATCGTCTCCTCCATGTCCAG              |
| CBF2                            |      | TGACGTGTCCTTATGGAGCTA             |
|                                 |      | CTGCACTCAAAAACATTTGCA             |
| CBF3                            |      | GATGACGACGTATCGTTATGGA            |
|                                 |      | TACACTCGTTTCTCAGTTTTACAAAC        |
| PIF1                            |      | CTCTTCAGCTTCAAATACAGATG           |
|                                 |      | GAATAGGCTGGTTCATACC               |
| PIF3                            |      | CTCCAACTTCAAGTGCAGATC             |
|                                 |      | GCAAGCCCATTGCATAAG                |
| PIF4                            |      | CAGCTTCAAGTGATGTGGATG             |
|                                 |      | CATAACCGGAAATCGAGGTAA             |
| PIF5                            |      | CAACTCCAAGTGATGTGGATG             |
|                                 |      | CAATTGCATCTGACTTTGCAT             |
| phyA                            |      | GAAGGATGCTTGGATTTGGA              |
|                                 |      | CCTCAGGGAAGCTGAAACAG              |
| phyB                            |      | CGTGACATTCCCGAAGAGAT              |
|                                 |      | CTCTGGAGGCAGACCTTCAC              |
| COP1                            |      | TCACGAGACCCGTGACATC               |
|                                 |      | GGACTATCACTCTTCCAGC               |
| HY5                             |      | CCATCAAGCAGCGAGAGGTCATCAA         |
|                                 |      | CGCCGATCCAGATTCTCTACCGGAA         |
| Tubulin3                        |      | ATCCGTGAAGAGTACCCAGAT             |
|                                 |      | AAGAACCATGCACTCATCAGC             |



| ChIP-qPCR        |                                                 |
|------------------|-------------------------------------------------|
| PIF4p-a          | GCATTTTGATTTACATTT                              |
|                  | GACCCAATATATTTTCTT                              |
| PIF4-exon        | ACCAAGGTTGGAGTTTTGAGGA                          |
|                  | CCACTTGTCCATCTCGCCAT                            |
| PIF5p-a          | CGCCGCTTCTAGCCTTTC                              |
|                  | CCGAAAAATACAAATTTA                              |
| PIF5-exon        | AATCGAGCCAACGGTCAGG                             |
|                  | GCTGCAGTGAGGTATGAGTTCT                          |
| EMSA Probes      |                                                 |
| PIF4-GCC/DRE-WT  | biotin-TTCCTCTCCGCCGCCAATCTGCCGACAAGTTTCTTTTCGT |
|                  | ACGAAAAGAACTTGTCCGCAGATTGGCGGCGGAGAGGAA         |
| PIF4-GCC/DRE-mut | biotin-TTCCTCTCCTCCTCCAATCTACTTATAAGTTTCTTTTCGT |
|                  | ACGAAAAGAACTTATAAGTAGATTGGAGGAGGAGAGGAA         |
| PIF5-GCC-WT      | biotin-TACTTCCATCGCCGCCACCGCCGCCTGAATGTTTCAGAAC |
|                  | GTTCTGAAACATTCAGGCGGCGGTGGCGGCGATGGAAGTA        |
| PIF5-GCC-mut     | biotin-TACTTCCATCTCCTCCACCTCCTCCTGAATGTTTCAGAAC |
|                  | GTTCTGAAACATTCAGGAGGAGGTGGAGGAGATGGAAGTA        |
