# Supplementary material
Source: PubMed Central journal article supplement (PMC7327500)

Figure 2D

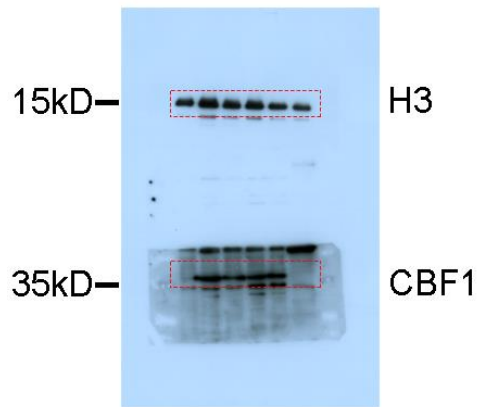

Figure 2E

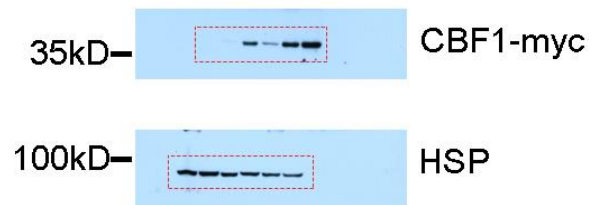

Figure 2F

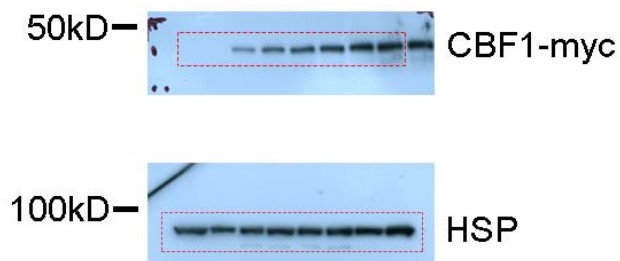

Figure 2G

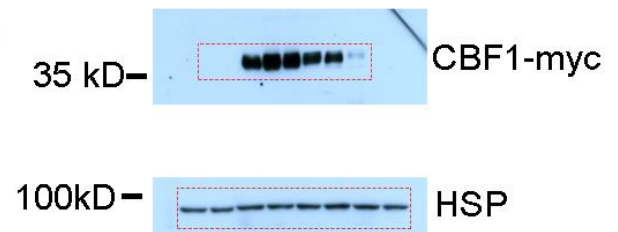

Figure 2H

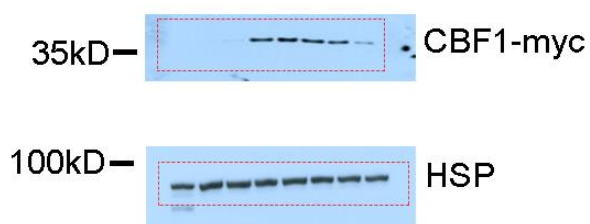

Figure 2I

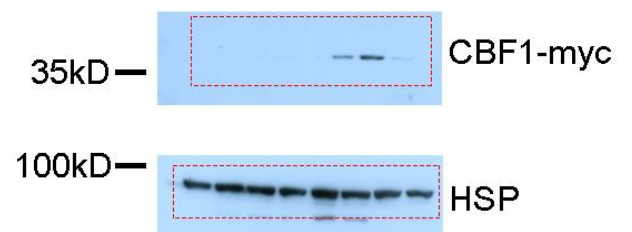

Figure 2J

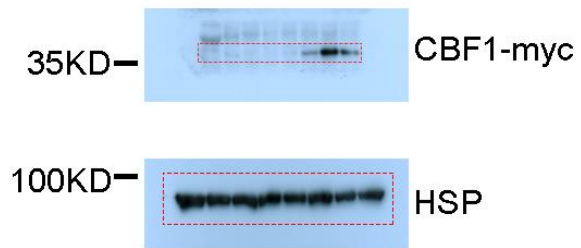

Supplement: EMBJ-39-e103630-s004.pdf [file EMBJ-39-e103630-s004.pdf]

Figure 3A Figure 3B

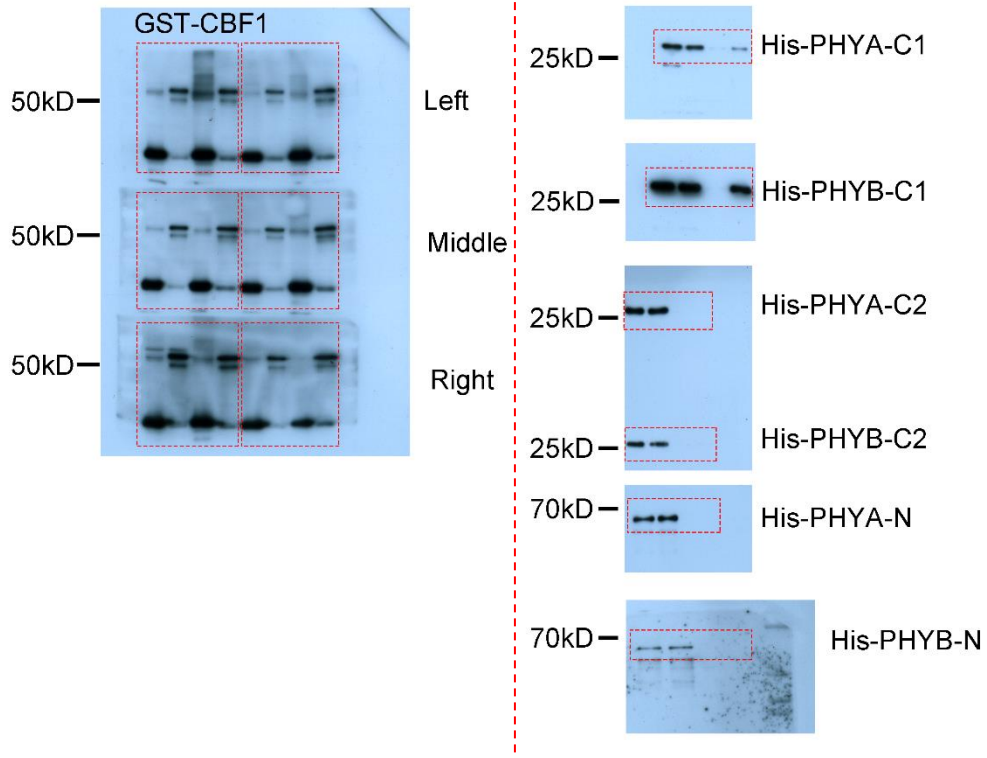

Figure 3D

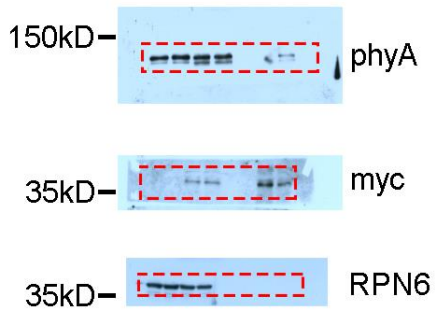

Figure 3E

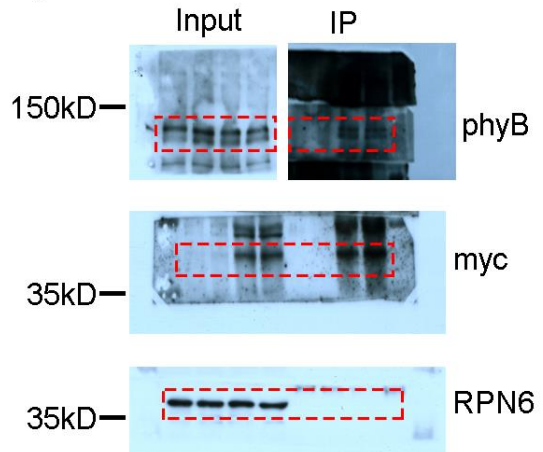

Supplement: EMBJ-39-e103630-s005.pdf [file EMBJ-39-e103630-s005.pdf]

Figure 4A

Upper

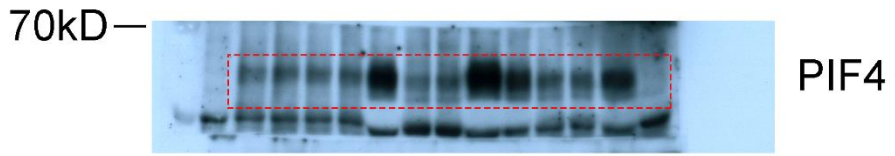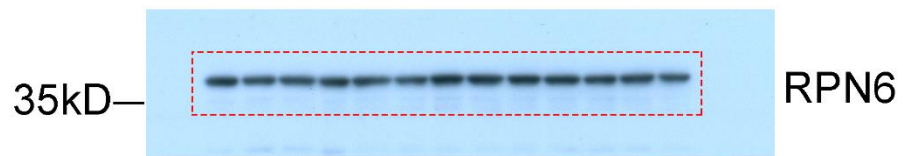

Lower

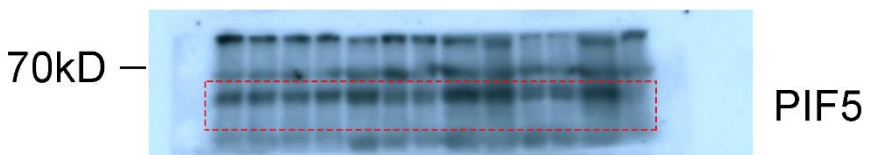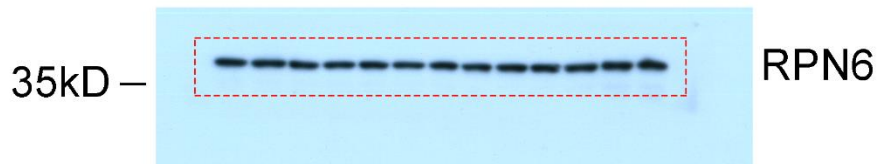

Figure 4C

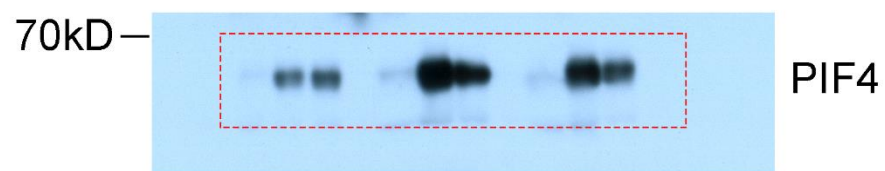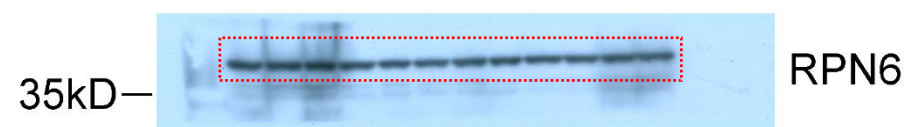

Supplement: EMBJ-39-e103630-s006.pdf [file EMBJ-39-e103630-s006.pdf]

Figure 5E

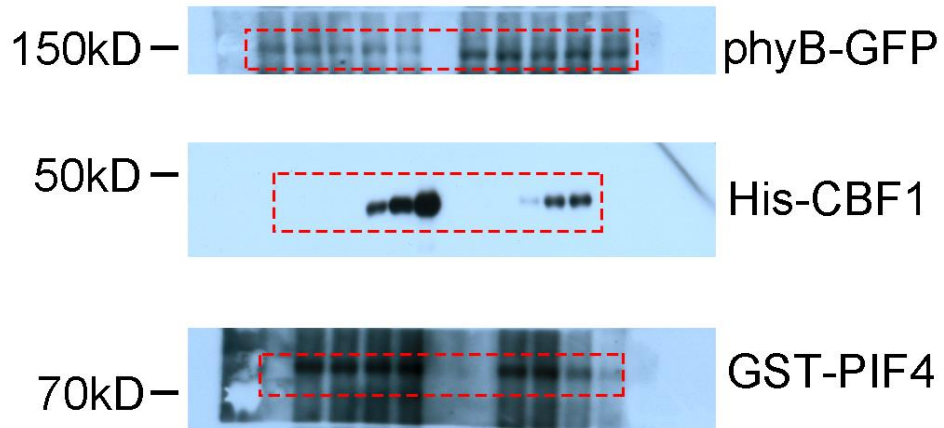

Figure 5F

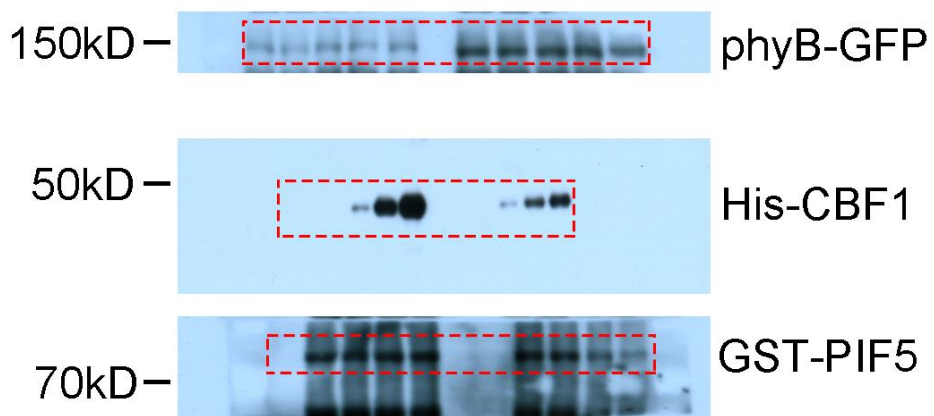

Supplement: EMBJ-39-e103630-s007.pdf [file EMBJ-39-e103630-s007.pdf]

Figure 6E

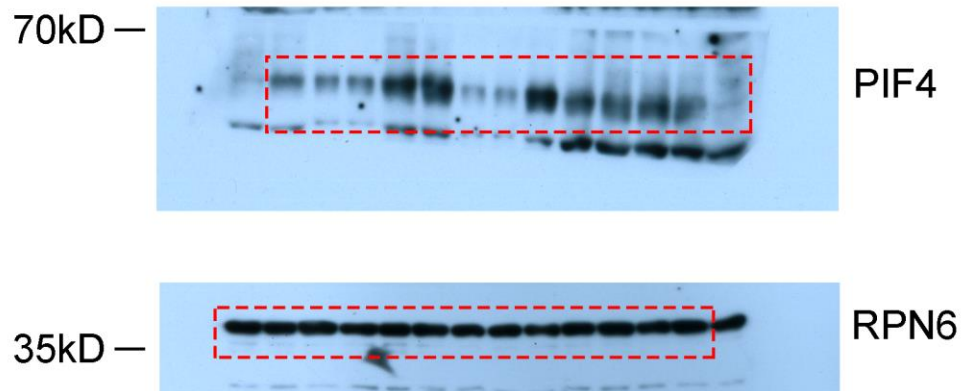

Figure 6F

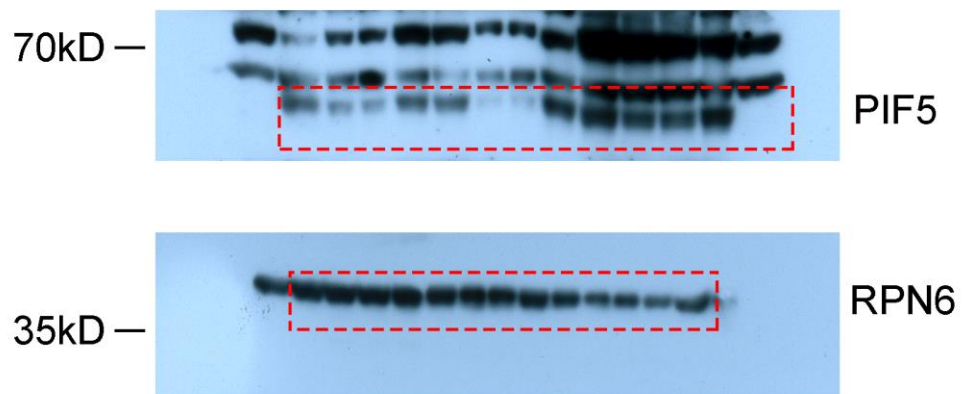

Supplement: EMBJ-39-e103630-s008.pdf [file EMBJ-39-e103630-s008.pdf]
